# Supplementary material for: Feasibility and Reliability Assessment of Video-Based Motion Analysis and Surface Electromyography in Children with Fragile X during Gait
Source: MDPI journal article supplement (doi:10.3390/s21144746), 2021-07-12
Supplement: s1 [file s1]

Table A1a. Gait velocity in the preliminary set of CS [19], mean and standard deviation in the analysed subjects.

| CS Subjects | Trial | Velocity [m/s] |
|-------------|-------|----------------|
| CS1         | DX1   | 1,08           |
|             | DX2   | 1,01           |
|             | DX3   | 1,03           |
|             | SX1   | 1,13           |
|             | SX2   | 1,06           |
|             | SX3   | 1,07           |
| CS2         | DX1   | 0,95           |
|             | DX2   | 1,00           |
|             | DX3   | 1,01           |
|             | SX1   | 0,98           |
|             | SX2   | 0,98           |
|             | SX3   | 1,06           |
| CS3         | DX1   | 0,88           |
|             | DX2   | 0,89           |
|             | DX3   | 0,96           |
|             | SX1   | 1,00           |
|             | SX2   | 0,86           |
|             | SX3   | 1,03           |
| CS4         | DX1   | 1,23           |
|             | DX2   | 1,20           |
|             | DX3   | 1,18           |
|             | SX1   | 1,19           |
|             | SX2   | 1,14           |
|             | SX3   | 1,05           |
| CS5         | DX1   | 1,24           |
|             | DX2   | 1,21           |
|             | DX3   | 1,27           |
|             | SX1   | 1,31           |
|             | SX2   | 1,32           |
|             | SX3   | 1,25           |
| CS6         | DX1   | 1,11           |
|             | SX1   | 1,16           |
| CS7         | DX1   | 1,14           |
|             | DX2   | 1,08           |
|             | DX3   | 1,14           |
|             | SX1   | 1,23           |
|             | SX2   | 1,27           |
|             | SX3   | 0,95           |
| CS8         | DX1   | 1,25           |
|             | DX2   | 0,99           |
|             | DX3   | 1,12           |
|             | SX1   | 1,17           |
|             | SX2   | 0,93           |
|             | SX3   | 1,07           |
| CS9         | DX1   | 1,20           |
|             | DX2   | 1,11           |

|                 |             |      |
|-----------------|-------------|------|
|                 | DX3         | 1,14 |
|                 | SX1         | 1,22 |
|                 | SX2         | 1,10 |
|                 | SX3         | 1,10 |
| CS10            | DX1         | 1,05 |
|                 | SX1         | 1,15 |
| <b>MEAN</b>     | <b>1,10</b> |      |
| <b>ST. DEV.</b> | <b>0,12</b> |      |

Table A1b. Gait velocity in the preliminary set of FXS [19], mean and standard deviation in the analysed subjects.

| <b>FXS Subjects</b> | <b>Trial</b> | <b>Velocity [m/s]</b> |
|---------------------|--------------|-----------------------|
| FXS1                | DX1          | 0,59                  |
|                     | SX1          | 0,81                  |
| FXS2                | DX1          | 1,03                  |
|                     | DX2          | 0,99                  |
|                     | SX1          | 0,97                  |
|                     | SX2          | 1,06                  |
| FXS3                | DX1          | 0,72                  |
|                     | SX1          | 0,63                  |
| FXS4                | DX1          | 0,56                  |
|                     | DX2          | 0,50                  |
|                     | SX1          | 0,69                  |
|                     | SX2          | 1,14                  |
| <b>MEAN</b>         | <b>0,81</b>  |                       |
| <b>ST. DEV.</b>     | <b>0,22</b>  |                       |
