# Supplementary material for: Feasibility and Reliability Assessment of Video-Based Motion Analysis and Surface Electromyography in Children with Fragile X during Gait
Source: MDPI journal article supplement (doi:10.3390/s21144746), 2021-07-12
Supplement: s1 [file s1]

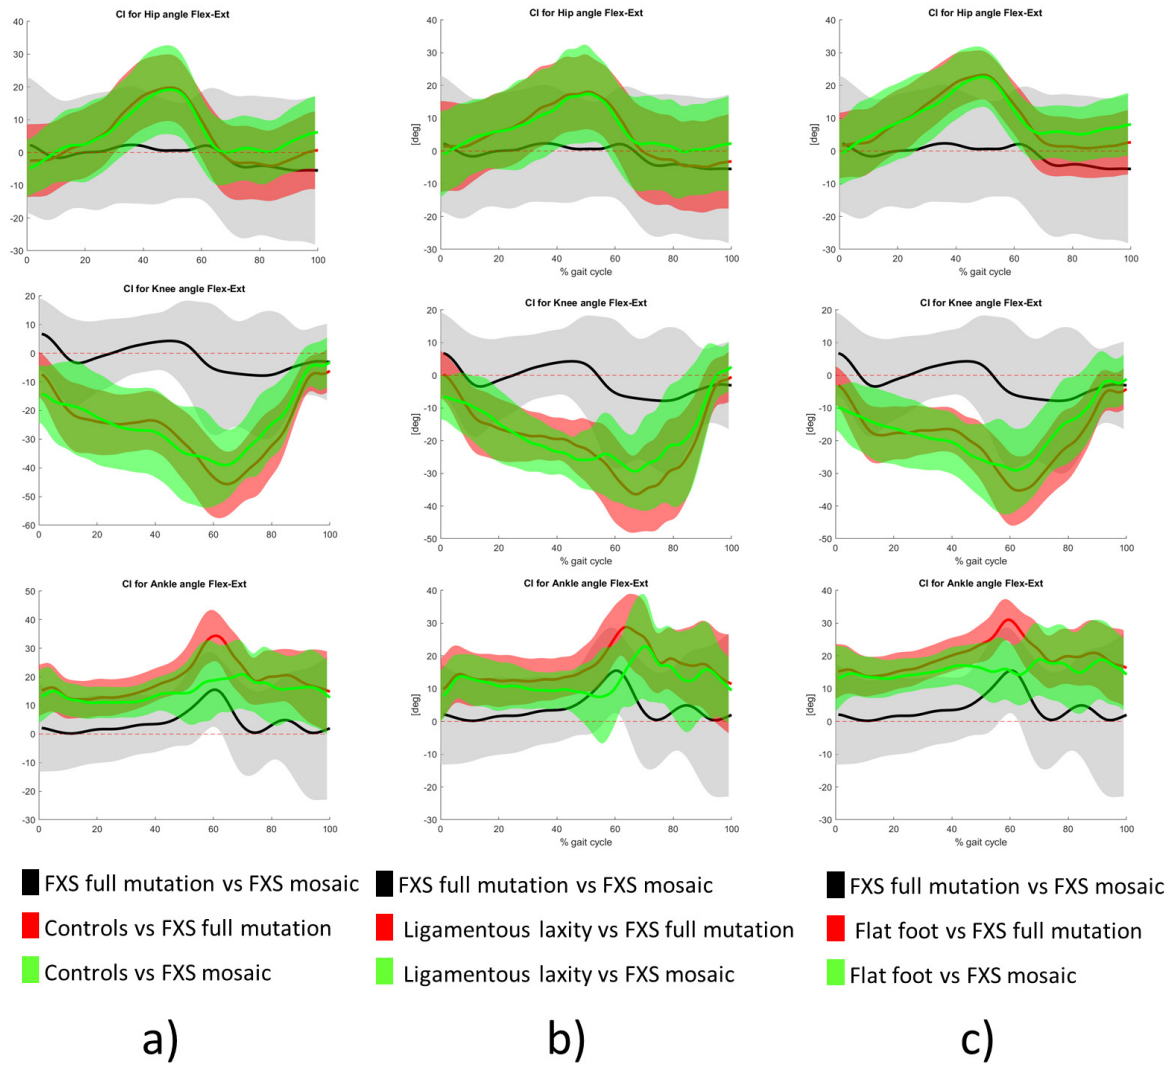

Figure A2a. Confidence intervals for the comparison of hip, knee and ankle sagittal plane angles between CS vs FXS Full Mutation vs FXS Mosaics (a), CSL vs FXS Full Mutation vs FXS Mosaics (b), CSF vs FXS Full Mutation vs FXS Mosaics (c)

Figure A2b. Confidence intervals and the difference between means of two compared groups for comparisons of the envelope profiles between FXS Full Mutation vs FXS Mosaics, CS vs FXS Full Mutation, CS vs FXS Mosaics are presented

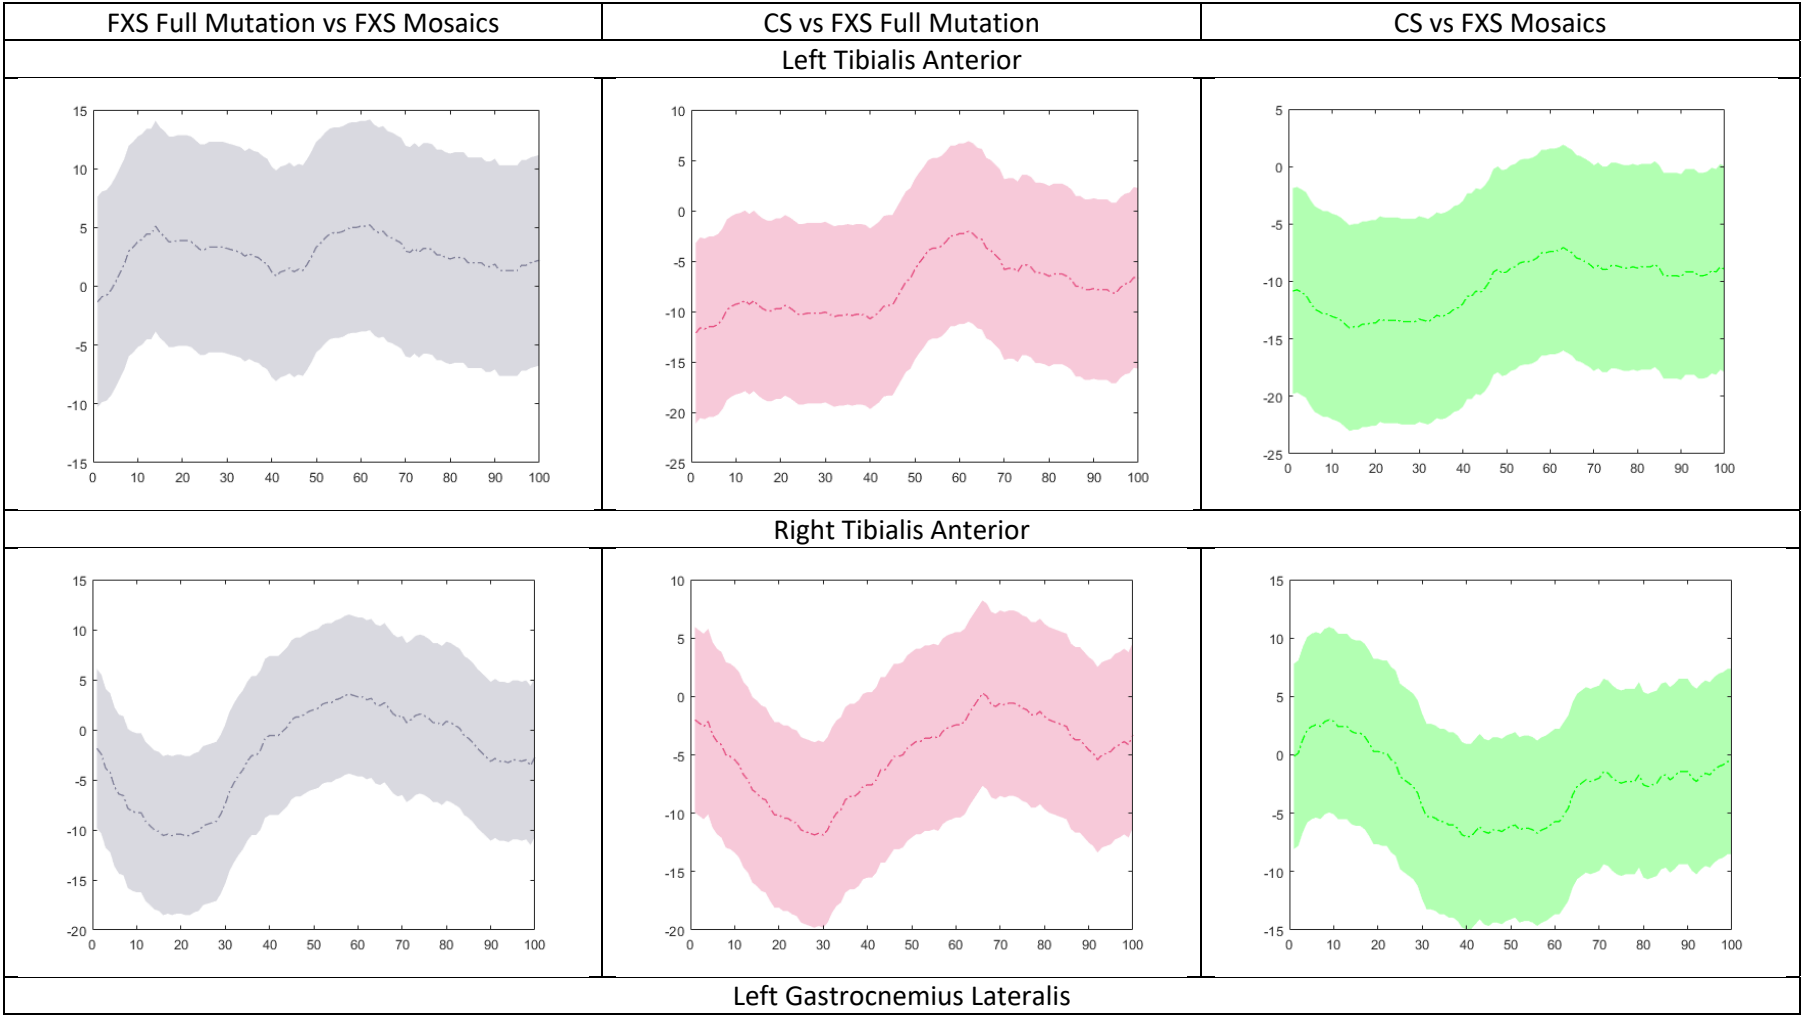

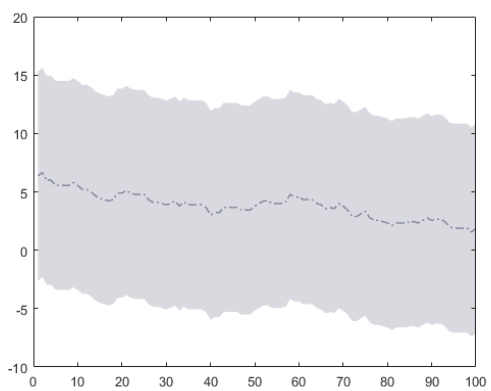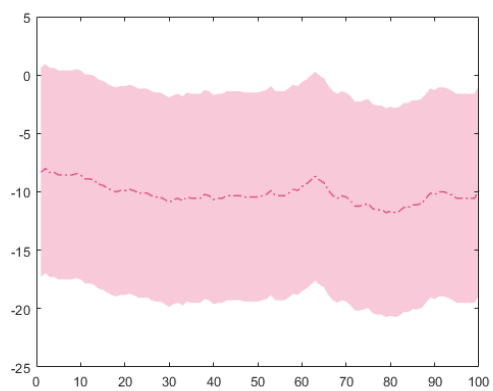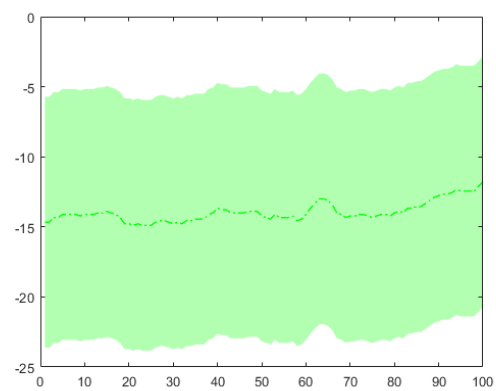

Right Gastrocnemius Lateralis

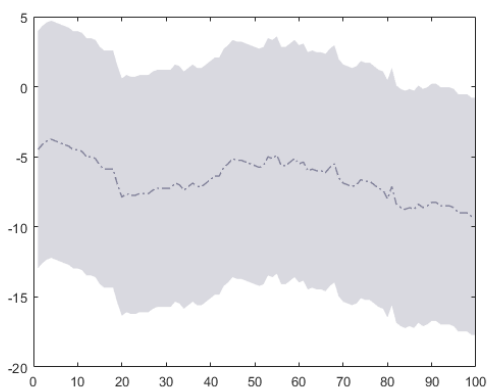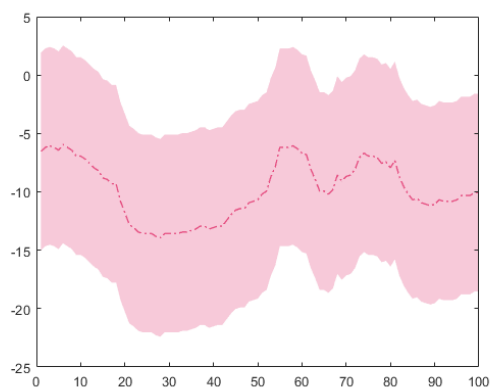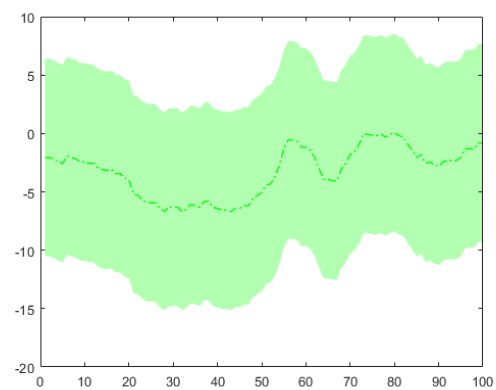

Left Rectus Femoris

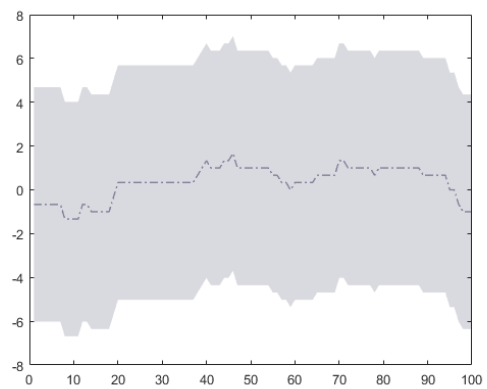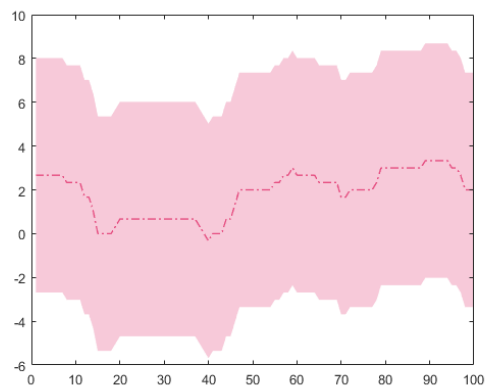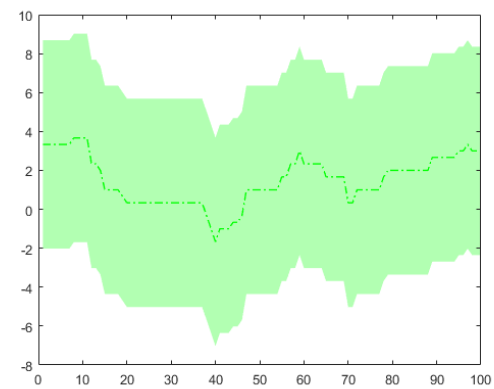

Right Rectus Femoris

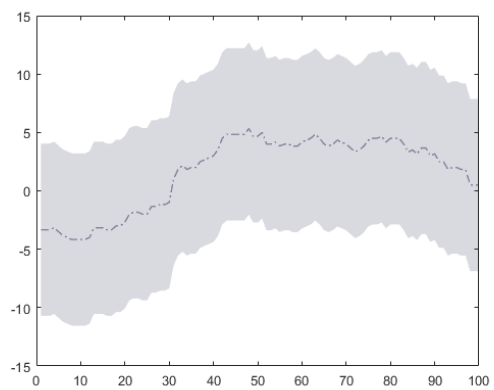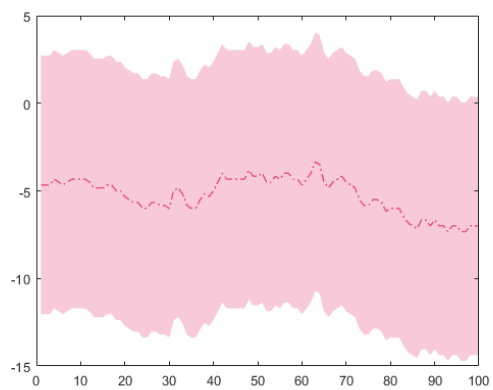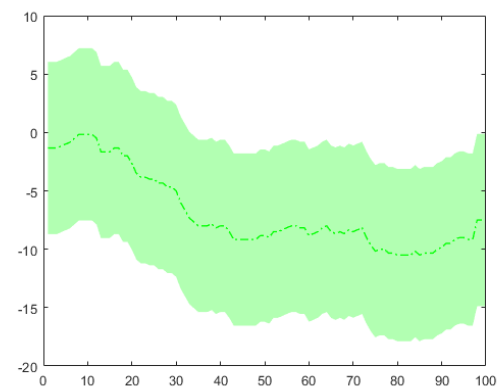

Left Biceps Femoris

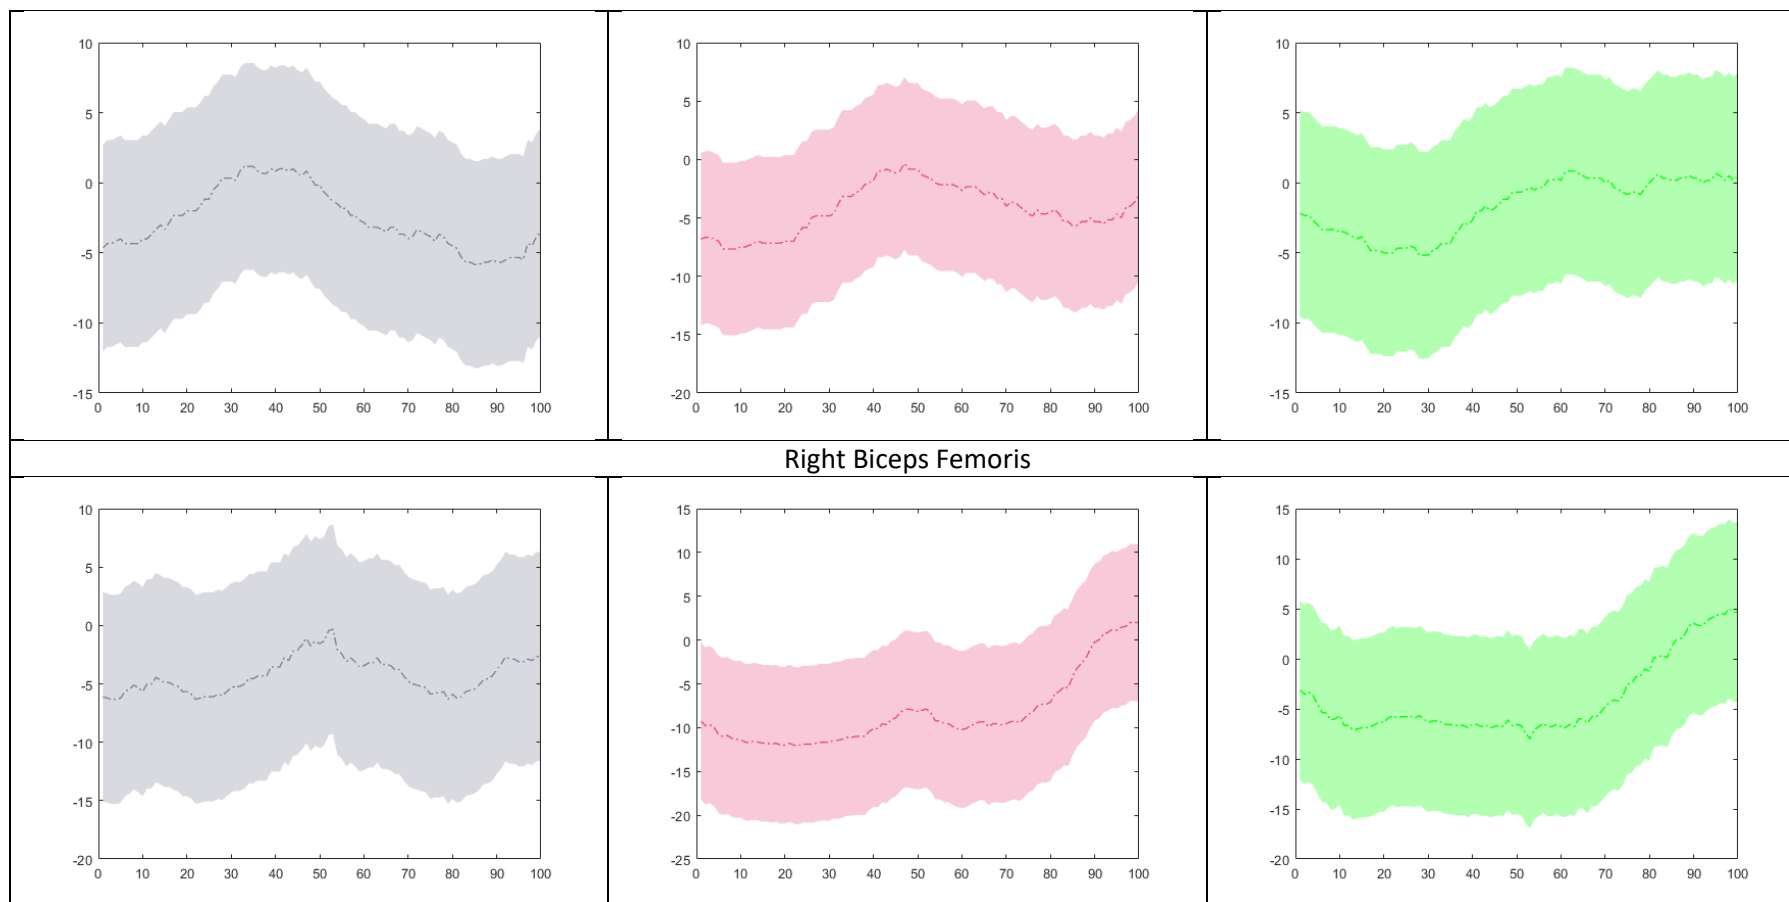

Figure A2c. Confidence intervals and the difference between means of two compared groups for comparisons of the envelope profiles between FXS Full Mutation vs FXS Mosaics, CSF vs FXS Full Mutation, CSF vs FXS Mosaics are presented.

| FXS Full Mutation vs FXS Mosaics | CSF vs FXS Full Mutation | CSF vs FXS Mosaics |
|----------------------------------|--------------------------|--------------------|
| Left Tibialis Anterior           |                          |                    |

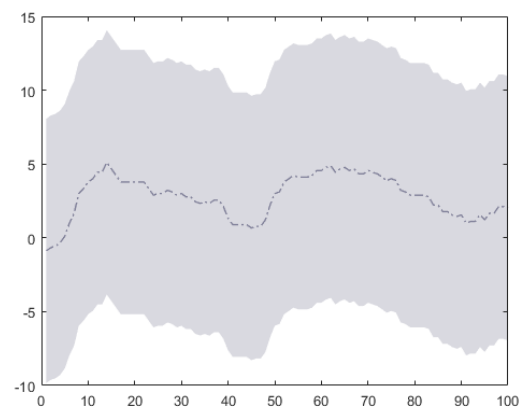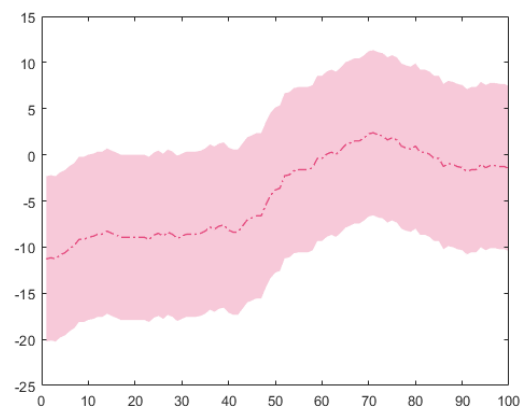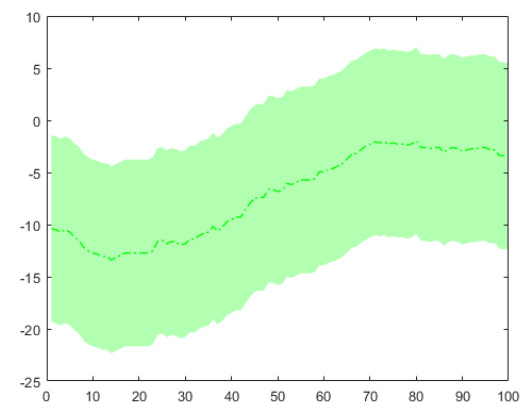

Right Tibialis Anterior

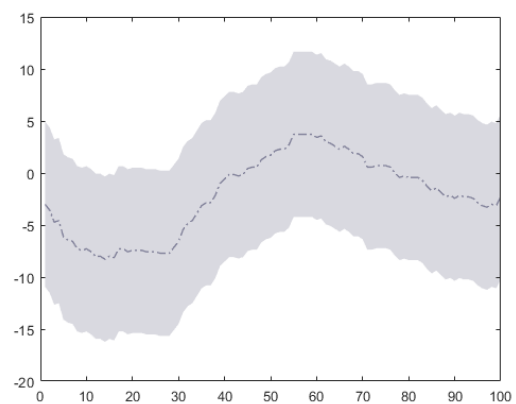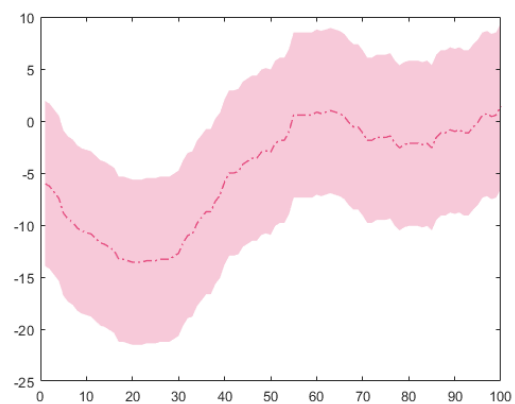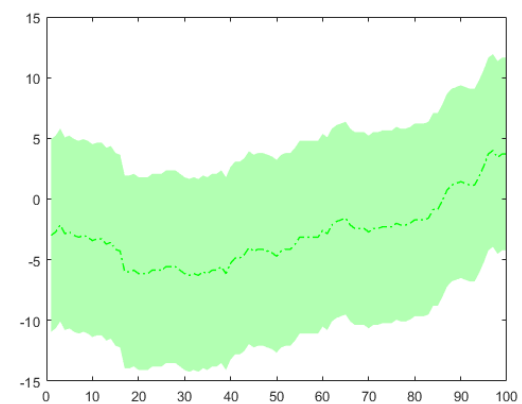

Left Gastrocnemius Lateralis

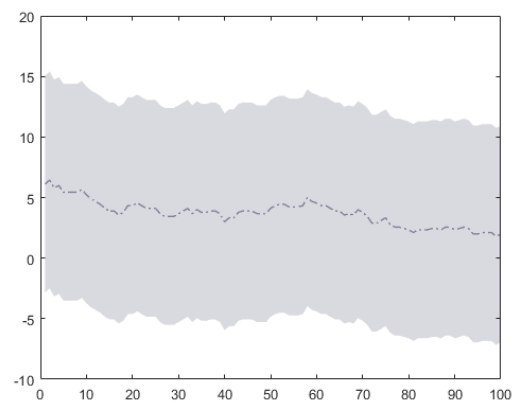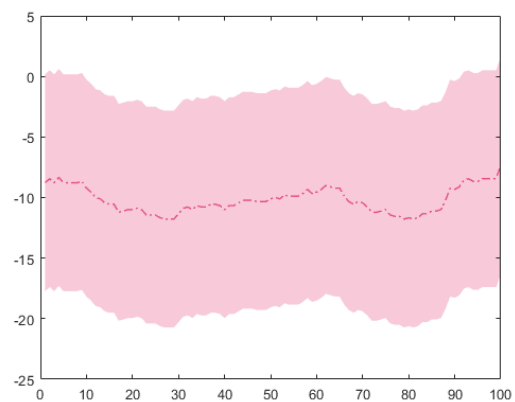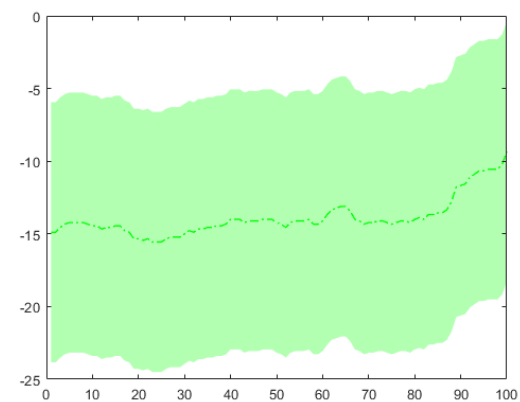

Right Gastrocnemius Lateralis

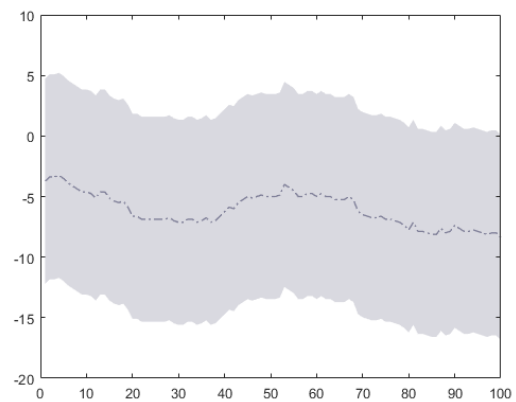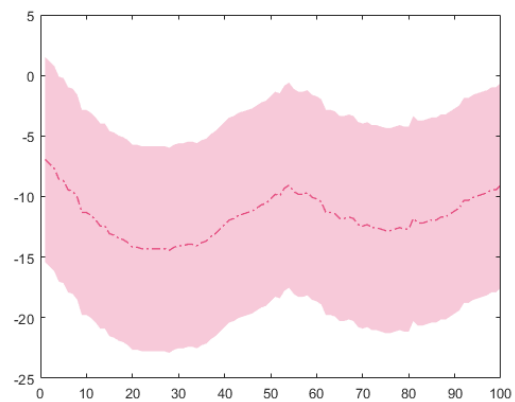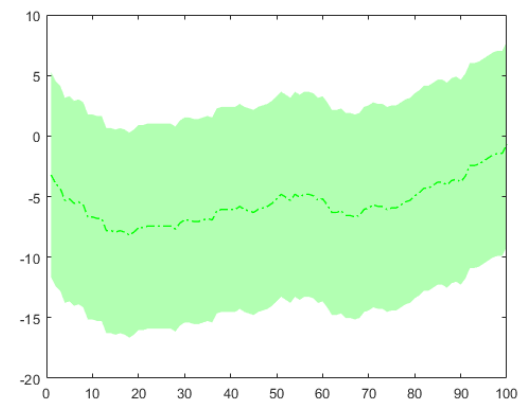

Left Rectus Femoris

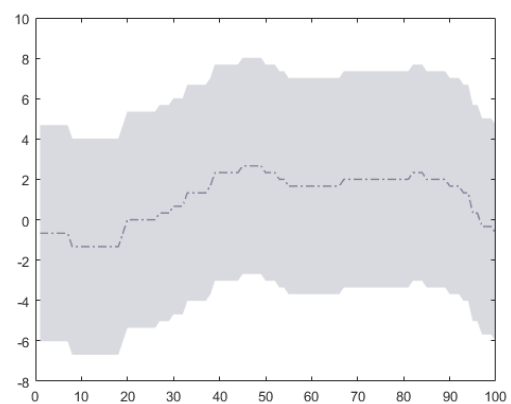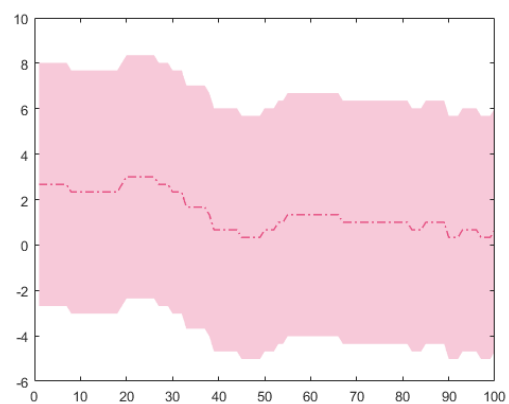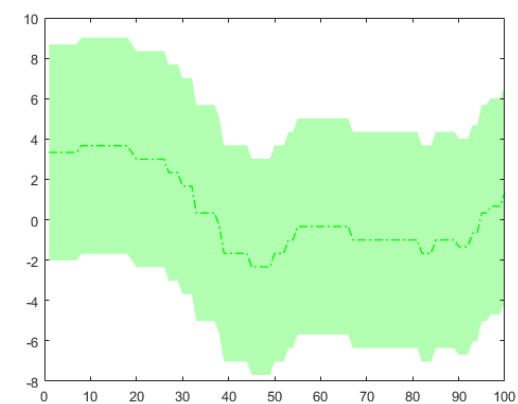

Right Rectus Femoris

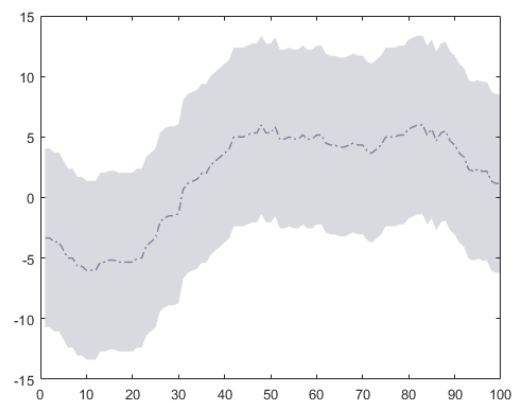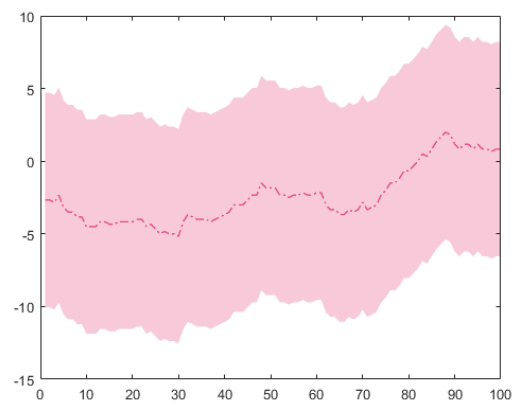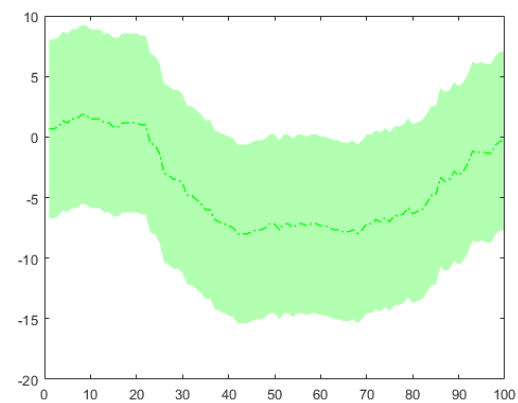

Left Biceps Femoris



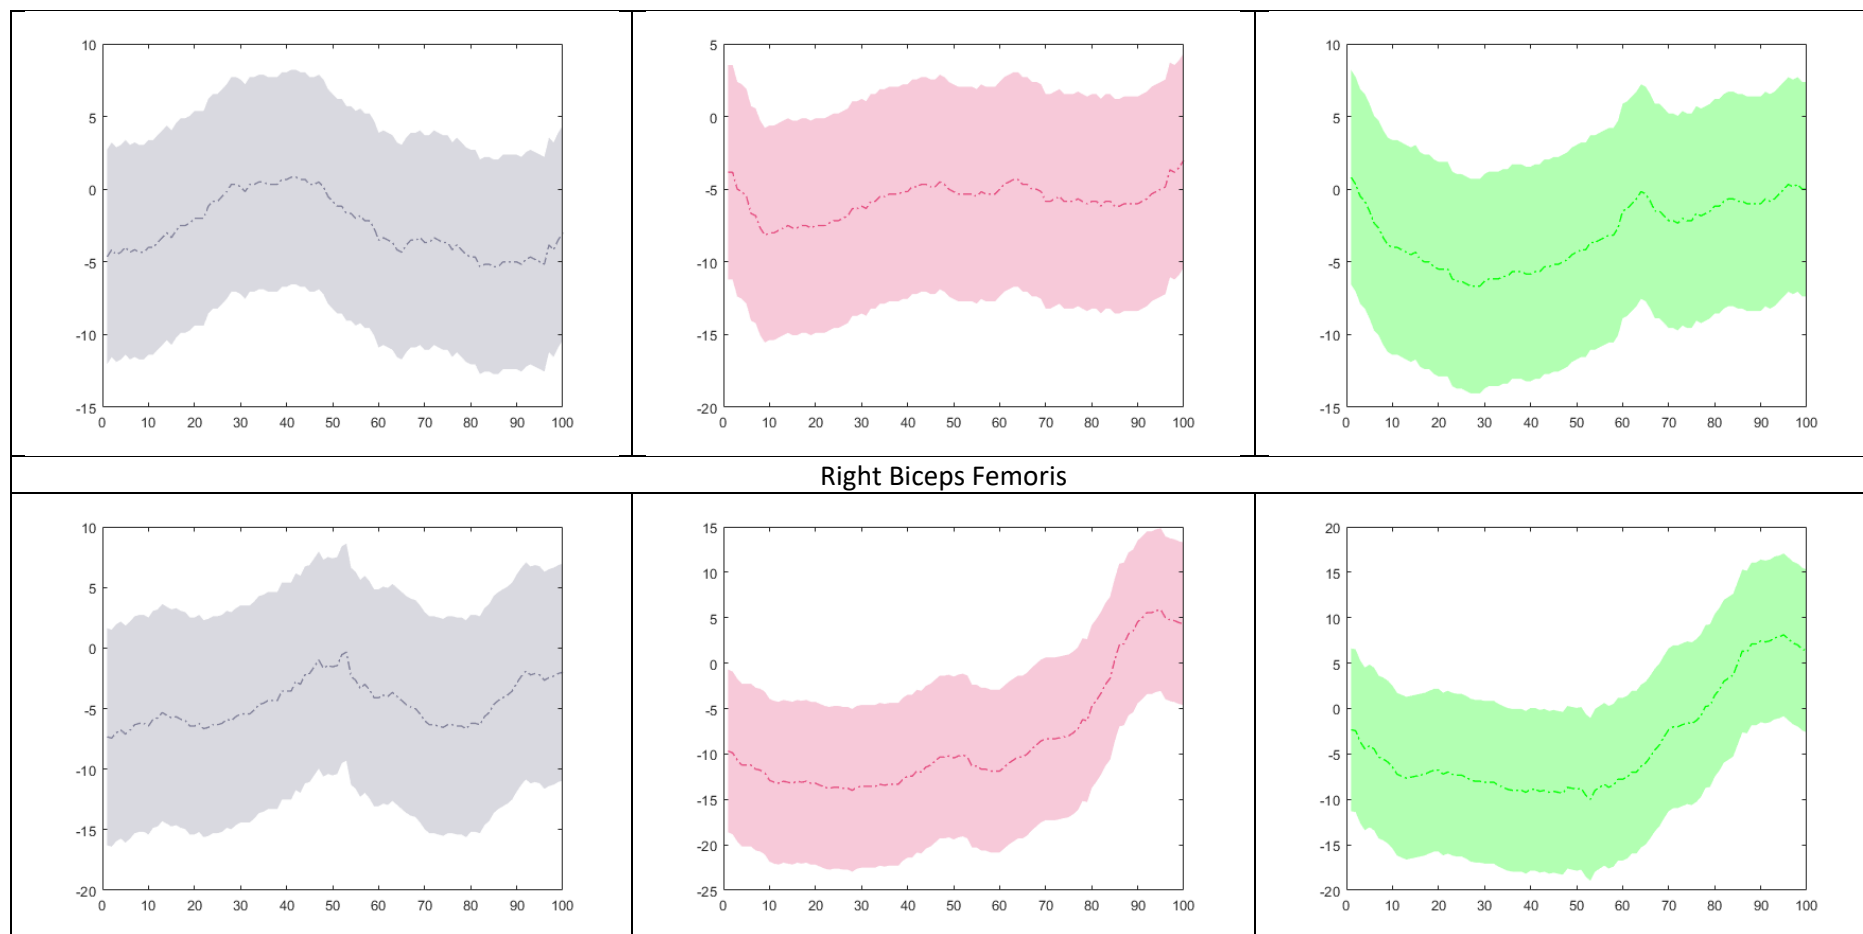

Figure A2d. Confidence intervals and the difference between means of two compared groups for comparisons of the envelope profiles between FXS Full Mutation vs FXS Mosaics, CSL vs FXS Full Mutation, CSL vs FXS Mosaics are presented

|                                  |                          |                    |
|----------------------------------|--------------------------|--------------------|
| FXS Full Mutation vs FXS Mosaics | CSL vs FXS Full Mutation | CSL vs FXS Mosaics |
|----------------------------------|--------------------------|--------------------|

Left Tibialis Anterior

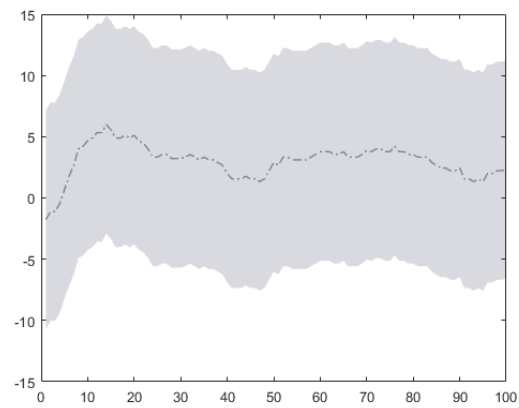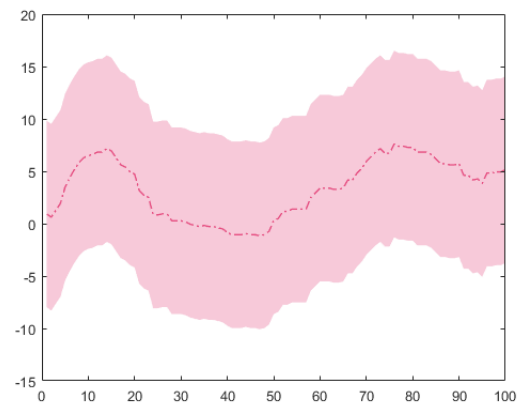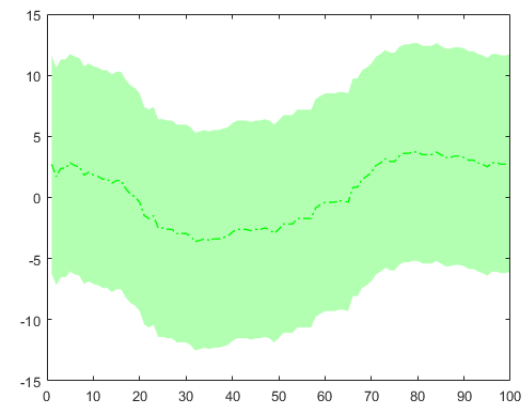

Right Tibialis Anterior

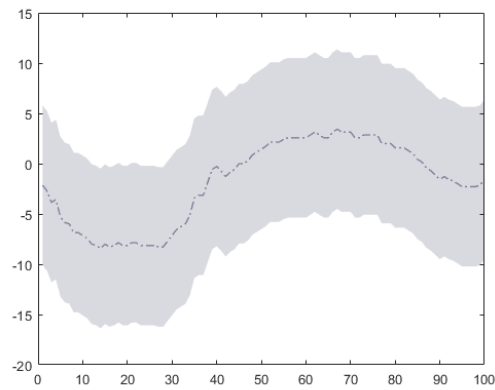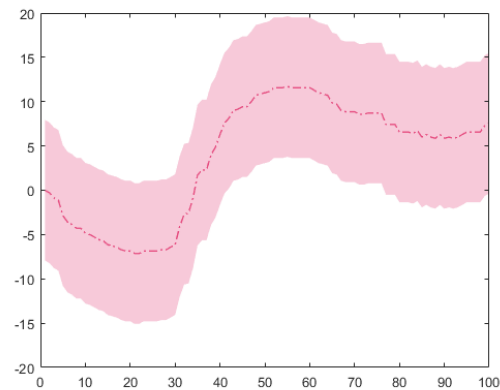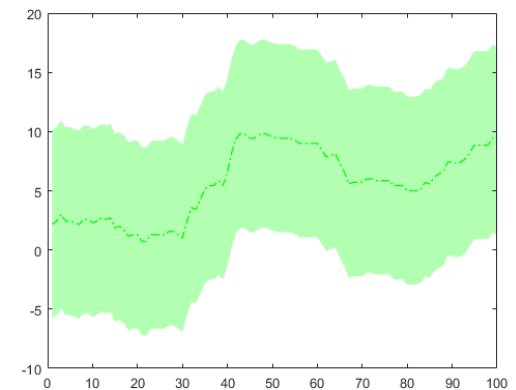

Left Gastrocnemius Lateralis

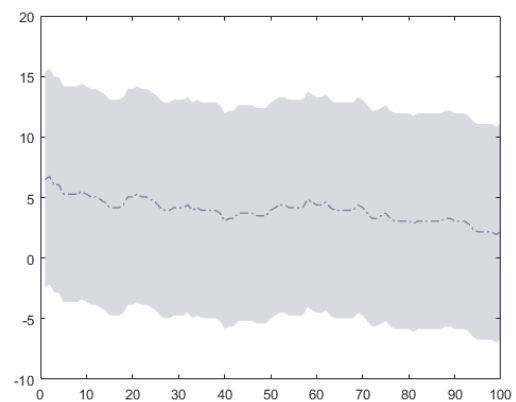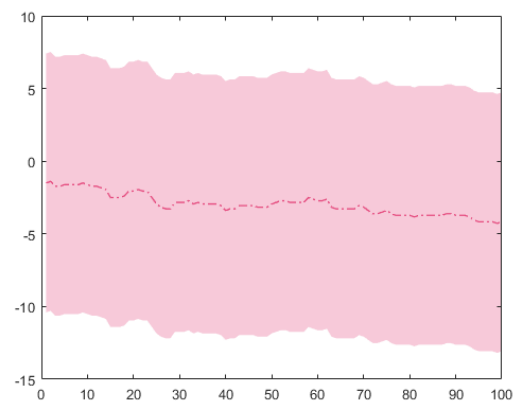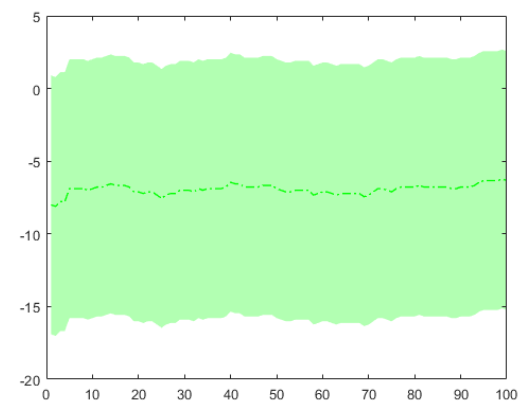

Right Gastrocnemius Lateralis

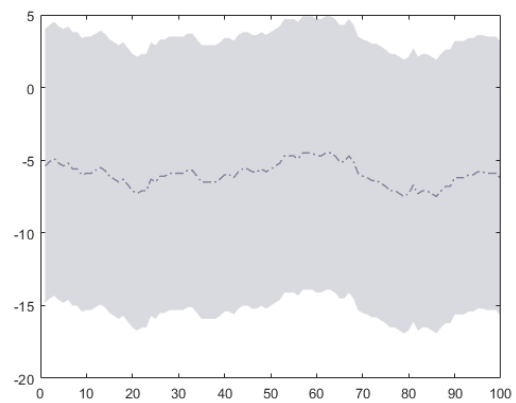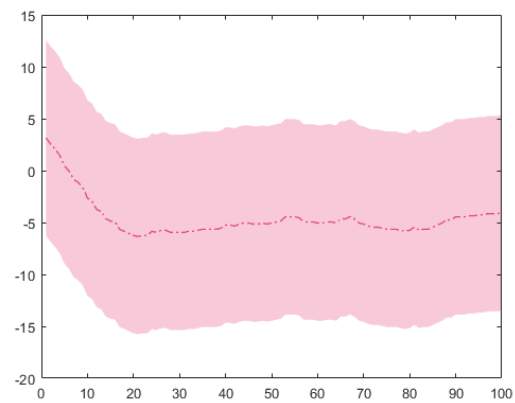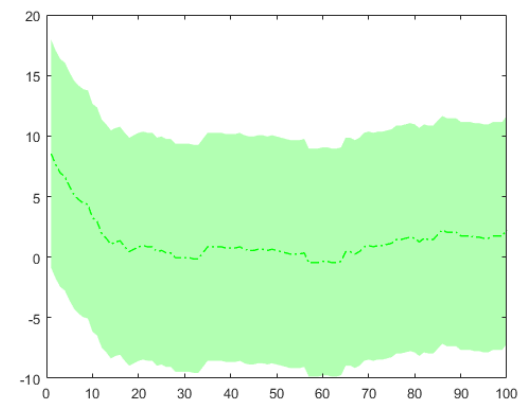

Left Rectus Femoris

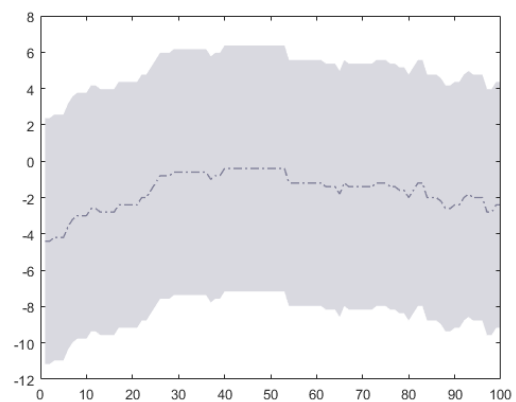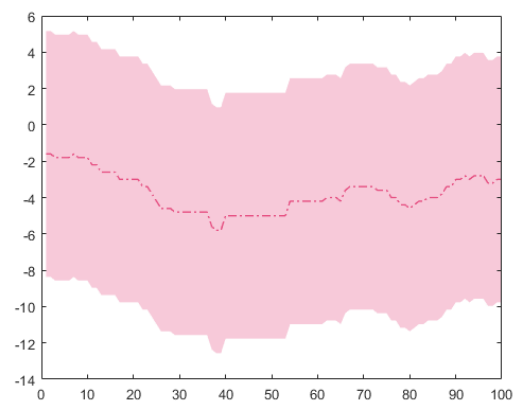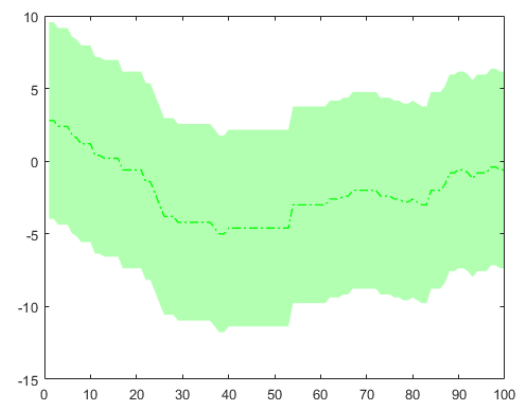

Right Rectus Femoris

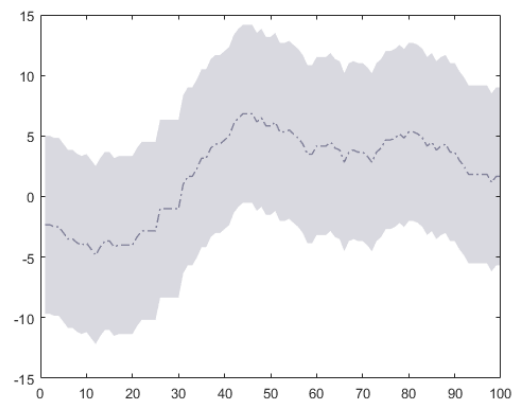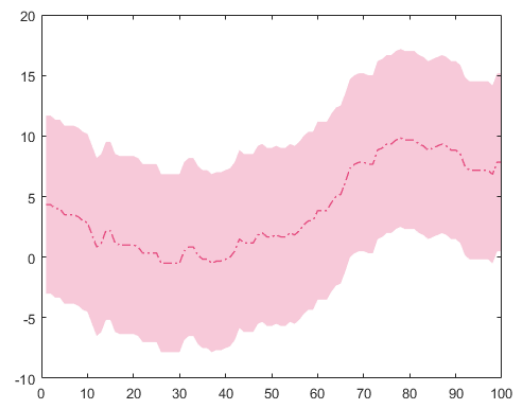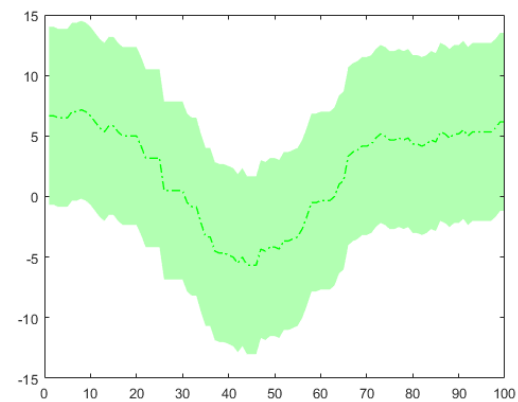

Left Biceps Femoris

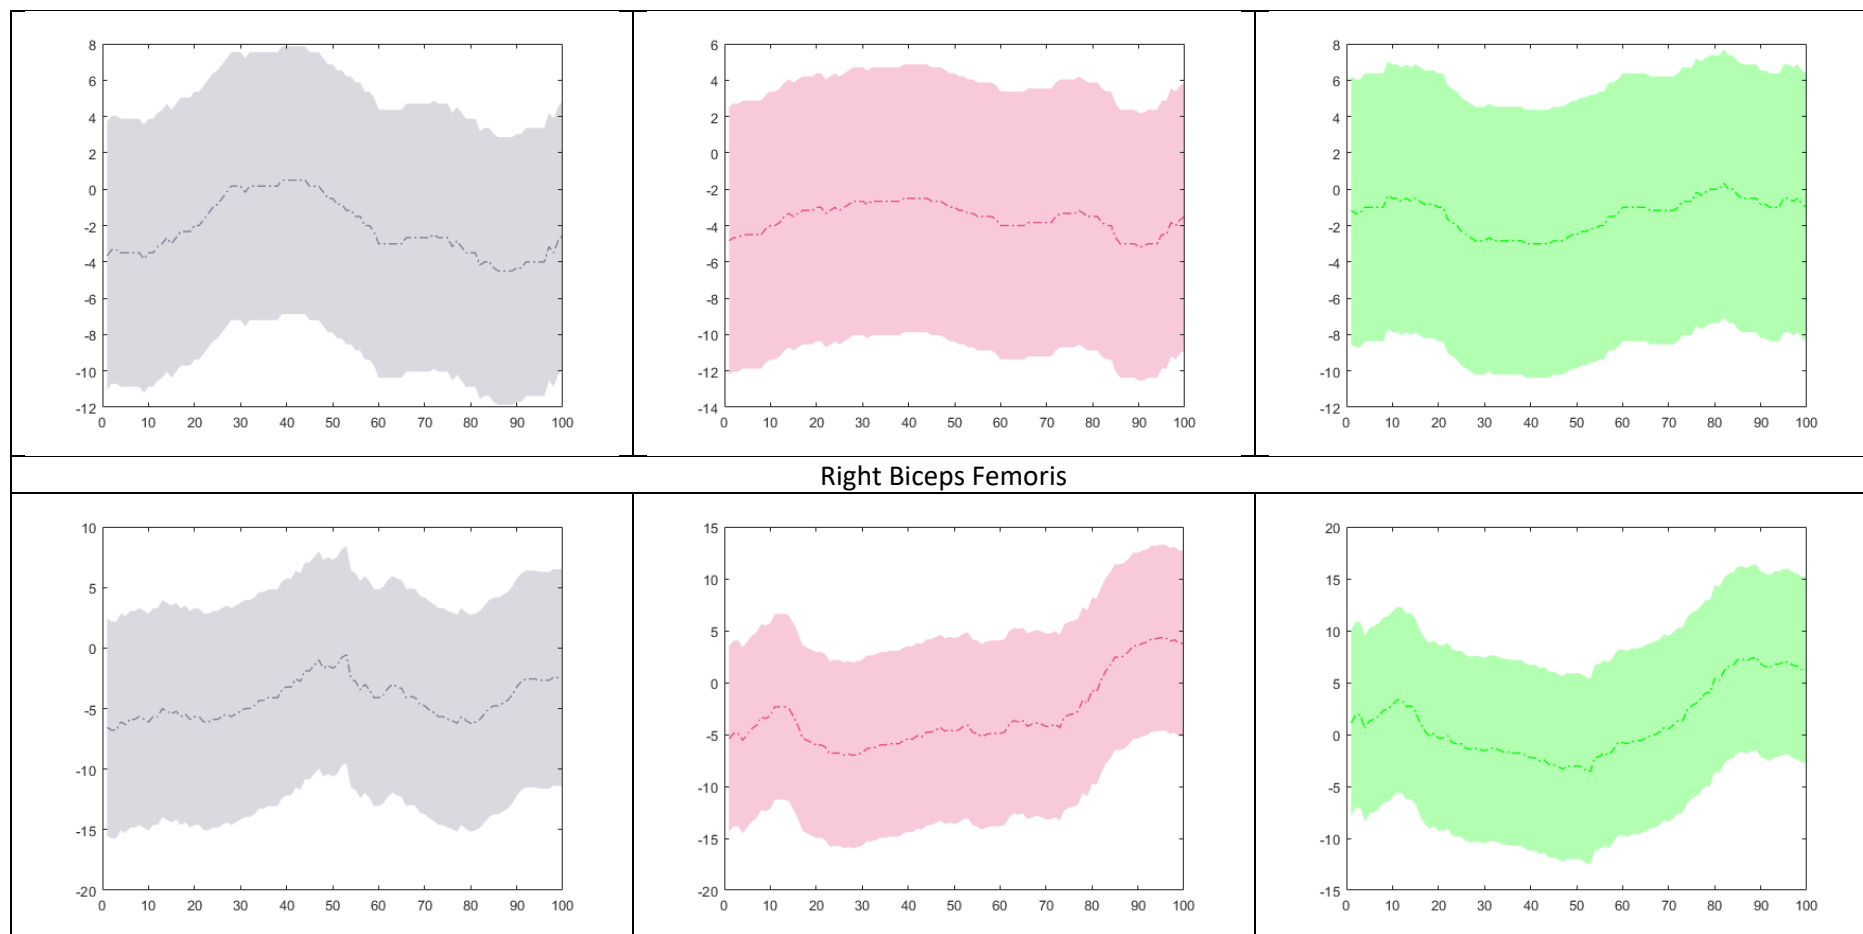

Table A2a. P value, lower and upper bounds of 95% confidence interval for the statistical analysis of spatio-temporal parameters

| Parameter         | Comparison                       | p      | Lower bound of 95% confidence interval | Upper bound of 95% confidence interval |
|-------------------|----------------------------------|--------|----------------------------------------|----------------------------------------|
| Stride length (m) | FXS Full Mutation vs FXS Mosaics | 0.519  | -0.237                                 | 0.076                                  |
|                   | FXS Full Mutation vs CS          | 0.619  | -0.032                                 | 0.215                                  |
|                   | FXS Full Mutation vs CSF         | 0.037  | -0.298                                 | -0.085                                 |
|                   | FXS Full Mutation vs CSL         | 0.013  | -0.338                                 | -0.048                                 |
|                   | FXS Mosaics vs CS                | 0.566  | -0.090                                 | 0.088                                  |
|                   | FXS Mosaics vs CSF               | 0.074  | -0.212                                 | -0.005                                 |
|                   | FXS Mosaics vs CSL               | 0.006  | -0.013                                 | 0.214                                  |
|                   | CS vs CSF                        | 0.010  | -0.171                                 | -0.030                                 |
|                   | CS vs CSL                        | 0.028  | -0.190                                 | -0.005                                 |
|                   | CSF vs CSL                       | 0.567  | -0.100                                 | 0.078                                  |
| Stride time (s)   | FXS Full Mutation vs FXS Mosaics | 0.0.68 | -0.033                                 | 0.233                                  |
|                   | FXS Full Mutation vs CS          | 0.001  | -0.300                                 | -0.067                                 |
|                   | FXS Full Mutation vs CSF         | 0.022  | 0.033                                  | 0.233                                  |
|                   | FXS Full Mutation vs CSL         | 0.147  | -0.067                                 | 0.200                                  |
|                   | FXS Mosaics vs CS                | 0.001  | -0.133                                 | -0.033                                 |
|                   | FXS Mosaics vs CSF               | 0.292  | -0.033                                 | 0.100                                  |
|                   | FXS Mosaics vs CSL               | 0.071  | 0.000                                  | 0.100                                  |
|                   | CS vs CSF                        | 0.051  | -0.100                                 | 0.000                                  |
|                   | CS vs CSL                        | 0.000  | -0.167                                 | -0.100                                 |
|                   | CSF vs CSL                       | 0.021  | 0.033                                  | 0.133                                  |
| Velocity (m/s)    | FXS Full Mutation vs FXS Mosaics | 0.561  | 0.382                                  | 0.073                                  |
|                   | FXS Full Mutation vs CS          | 0.007  | 0.050                                  | 0.447                                  |

|            |                                  |       |         |        |
|------------|----------------------------------|-------|---------|--------|
|            | FXS Full Mutation vs CSF         | 0.000 | -0.502  | -0.060 |
|            | FXS Full Mutation vs CSL         | 0.258 | -0.404  | 0.027  |
|            | FXS Mosaics vs CS                | 0.090 | -0.007  | 0.188  |
|            | FXS Mosaics vs CSF               | 0.009 | -0.210  | -0.037 |
|            | FXS Mosaics vs CSL               | 0.632 | -0.079  | 0.168  |
|            | CS vs CSF                        | 0.175 | -0.086  | 0.017  |
|            | CS vs CSL                        | 0.241 | -0.030  | 0.163  |
|            | CSF vs CSL                       | 0.032 | -0.189  | -0.013 |
| Stance (%) | FXS Full Mutation vs FXS Mosaics | 0.265 | -4.074  | 2.051  |
|            | FXS Full Mutation vs CS          | 0.007 | -4.598  | -0.639 |
|            | FXS Full Mutation vs CSF         | 0.000 | 1.255   | 5.376  |
|            | FXS Full Mutation vs CSL         | 0.825 | -1.347  | 3.333  |
|            | FXS Mosaics vs CS                | 0.000 | -5.447  | -2.098 |
|            | FXS Mosaics vs CSF               | 0.000 | 3.333   | 45.994 |
|            | FXS Mosaics vs CSL               | 0.212 | -3.958  | 0.000  |
|            | CS vs CSF                        | 0.128 | -0.0200 | 1.567  |
|            | CS vs CSL                        | 0.029 | -3.241  | -0.357 |
|            | CSF vs CSL                       | 0.001 | 1.210   | 3.958  |
| Swing (%)  | FXS Full Mutation vs FXS Mosaics | 0.920 | -2.051  | 4.074  |
|            | FXS Full Mutation vs CS          | 0.000 | 4.193   | 8.223  |
|            | FXS Full Mutation vs CSF         | 0.000 | -8.851  | -4.808 |
|            | FXS Full Mutation vs CSL         | 0.015 | -6.548  | -1.786 |
|            | FXS Mosaics vs CS                | 0.000 | 5.735   | 9.150  |
|            | FXS Mosaics vs CSF               | 0.000 | -9.489  | -6.667 |

|                    |                                  |       |         |        |
|--------------------|----------------------------------|-------|---------|--------|
|                    | FXS Mosaics vs CSL               | 0.022 | 3.333   | 7.083  |
|                    | CS vs CSF                        | 0.246 | -1.709  | 0.372  |
|                    | CS vs CSL                        | 0.025 | 0.754   | 3.819  |
|                    | CSF vs CSL                       | 0.002 | -4.242  | -1.494 |
| Cadence (step/min) | FXS Full Mutation vs FXS Mosaics | 0.213 | -12.069 | 1.935  |
|                    | FXS Full Mutation vs CS          | 0.000 | 5.333   | 15.915 |
|                    | FXS Full Mutation vs CSF         | 0.001 | -12.632 | -2.564 |
|                    | FXS Full Mutation vs CSL         | 0.660 | -8.882  | 4.286  |
|                    | FXS Mosaics vs CS                | 0.003 | 2.217   | 8.602  |
|                    | FXS Mosaics vs CSF               | 0.147 | -7.162  | 2.069  |
|                    | FXS Mosaics vs CSL               | 0.117 | -5.455  | 0.000  |
|                    | CS vs CSF                        | 0.056 | 0.000   | 5.819  |
|                    | CS vs CSL                        | 0.000 | 6.221   | 10.417 |
|                    | CSF vs CSL                       | 0.001 | -9.231  | -1.935 |
