# Supplementary material for: Feasibility and Reliability Assessment of Video-Based Motion Analysis and Surface Electromyography in Children with Fragile X during Gait
Source: Sensors (Basel). 2021 Jul 12;21(14):4746. doi: 10.3390/s21144746 (PMC8309640; doi:10.3390/s21144746)
Supplement: Supplementary file 1 [file sensors-21-04746-s001.zip]

Archive with 7 entries (7 files):
- Figure A2 Table A2b.pdf
- Figure A2a.PNG
- Figure A2b.PNG
- Figure A2c.PNG
- Figure A3.pdf
- FigureA3a.png
- Table A1a.pdf
